# Supplementary material for: Identification of Gene Expression Biomarkers for Predicting Radiation Exposure
Source: PubMed Central journal article supplement — Sci Rep. 2014 Sep 5;4:6293. doi: 10.1038/srep06293 (PMC4155333; doi:10.1038/srep06293), 2014-09-05
Supplement: srep06293-s1.pdf [file srep06293-s1.pdf]

## **Identification of Gene Expression Biomarkers for Predicting Radiation Exposure**

Tzu-Pin Lu,<sup>1,2</sup> Yi-Yao Hsu,<sup>3</sup> Liang-Chuan Lai,<sup>4,5</sup> Mong-Hsun Tsai,<sup>4,6,\*</sup> and Eric Y. Chuang,<sup>3,4,\*</sup>

<sup>1</sup>Department of Public Health, National Taiwan University, Taipei, Taiwan

<sup>2</sup>Institute of Epidemiology and Preventative Medicine, National Taiwan University, Taiwan

<sup>3</sup>Graduate Institute of Biomedical Electronics and Bioinformatics and Department of Electrical Engineering, National Taiwan University, Taipei, Taiwan

<sup>4</sup>Bioinformatics and Biostatistics Core, Center of Genomic Medicine, National Taiwan University, Taipei, Taiwan

<sup>5</sup>Graduate Institute of Physiology, National Taiwan University, Taipei, Taiwan

<sup>6</sup>Institute of Biotechnology, National Taiwan University, Taipei, Taiwan

## Supplementary Tables

**Table S1. Characteristics of testing samples.**

| <b>Accession<sup>*</sup></b> | <b>Sample number</b> | <b>Cell type</b>       | <b>Dose (Gy)</b> | <b>Time (h)</b> |
|------------------------------|----------------------|------------------------|------------------|-----------------|
| GSE762                       | 1                    | LNCap C4-2             | 10               | 6               |
| GSE7505                      | 63                   | NCI60, ML-1, TK6, NH32 | 8                | 4               |
| GSE20549                     | 6                    | H1299, H460            | 2                | 4               |
| GSE6978                      | 24                   | Lymphocyte             | 0.05, 0.5        | 3               |
| GSE8917                      | 15                   | Peripheral blood       | 0.5, 2, 8        | 24              |
| GSE25772                     | 4                    | Fibroblast             | 2                | 24              |
| GSE6971                      | 4                    | Fibroblast             | 1.5              | 24              |
| GSE20549                     | 6                    | H1299, H460            | 2                | 24              |
| GSE6978                      | 42                   | Lymphocyte             | 0.05 & 0.5       | 24              |

<sup>\*</sup> GEO accession number

**Table S2. Biomarkers for predicting radiation doses.**

| <b>Source (Gene No.)</b>          | <b>Gene symbol</b>                                                                                                                                                                                                                                                                                                                           |
|-----------------------------------|----------------------------------------------------------------------------------------------------------------------------------------------------------------------------------------------------------------------------------------------------------------------------------------------------------------------------------------------|
| Paul <i>et al.</i> [1]<br>(47)    | <i>AEN, ANKRA2, ANXA4, ARHGEF3, ASCC3, BAX, BBC3, BTG3, C11orf24, CCNG1, CD70, CDKN1A, DDB2, DRAM1, EI24, FBXO22, FDXR, GADD45A, GLS2, GNG7, IER5, IL21R, LIG1, LY9, MDM2, METTL7A, MGAT3, MYC, PCNA, PLK2, PLK3, POLH, PPM1D, PTP4A1, RPS27L, SESN1, TCF3, TM7SF3, TMEM30A, TNFRSF10B, TNFSF4, TRIAP1, TRIM22, UROD, XPC, ZMAT3, ZNF337</i> |
| Dressman <i>et al.</i> [2]<br>(8) | <i>BAX, BBC3, CDKN1A, DDB2, PRKCH, TMEM30A, TP53I3, XPC</i>                                                                                                                                                                                                                                                                                  |

**Table S3. Canonical pathways enriched by the three sets of biomarkers associated with distinct radiation doses.**

| Source                                  | Pathway name                                          | $-\log(P)$ * | Gene No. |
|-----------------------------------------|-------------------------------------------------------|--------------|----------|
| 29 biomarkers in higher and lower doses | Mitotic Roles of Polo-Like Kinase                     | 5.54         | 4        |
|                                         | Cell Cycle: G2/M DNA Damage Checkpoint Regulation     | 2.66         | 2        |
|                                         | Pyridoxal 5'-phosphate Salvage Pathway                | 2.33         | 2        |
|                                         | Salvage Pathways of Pyrimidine Ribonucleotides        | 2.02         | 2        |
| 35 biomarkers in higher dose            | Role of CHK Proteins in Cell Cycle Checkpoint Control | 3.81         | 3        |
|                                         | Role of BRCA1 in DNA Damage Response                  | 3.70         | 3        |
|                                         | Mitotic Roles of Polo-Like Kinase                     | 3.66         | 3        |
|                                         | p53 Signaling                                         | 3.07         | 3        |
|                                         | Cell Cycle: G2/M DNA Damage Checkpoint Regulation     | 2.52         | 2        |
| 51 biomarkers in lower dose             | p53 Signaling                                         | 6.60         | 6        |
|                                         | Hereditary Breast Cancer Signaling                    | 4.89         | 5        |
|                                         | Role of BRCA1 in DNA Damage Response                  | 4.68         | 4        |
|                                         | Cell Cycle: G2/M DNA Damage Checkpoint Regulation     | 3.67         | 3        |
|                                         | ATM Signaling                                         | 3.26         | 3        |

\* Only pathways with  $-\log(P) > 2$  were shown here

**Table S4. Upstream regulators enriched by the three sets of biomarkers associated with distinct radiation doses.**

| <b>Source</b>                           | <b>Regulator</b> | <b><math>-\log(P)^*</math></b> | <b>Gene No.</b> |
|-----------------------------------------|------------------|--------------------------------|-----------------|
| 29 biomarkers in higher and lower doses | <i>FOXM1</i>     | 20.65                          | 10              |
|                                         | <i>ERBB2</i>     | 13.97                          | 10              |
|                                         | <i>TP53</i>      | 13.23                          | 13              |
|                                         | <i>TGFB1</i>     | 11.28                          | 10              |
| 35 biomarkers in higher dose            | <i>FOXM1</i>     | 19.69                          | 10              |
|                                         | <i>ERBB2</i>     | 13.02                          | 10              |
|                                         | <i>CDK4</i>      | 11.99                          | 9               |
|                                         | <i>TP53</i>      | 11.95                          | 13              |
| 51 biomarkers in lower dose             | <i>CCND1</i>     | 11.62                          | 9               |
|                                         | <i>TP53</i>      | 16.05                          | 18              |
|                                         | <i>SLC29A1</i>   | 14.15                          | 7               |
|                                         | <i>ANXA2</i>     | 12.91                          | 7               |

\* Only regulators with  $-\log(P) > 10$  were shown here

**Figure S1. Prediction performances of the three sets of biomarkers in external datasets collected at 24 hours after irradiation.** A 10-fold cross-validation was repeated 10,000 times and the prediction accuracies in the samples treated with high (N=5) and/or low (N=66) radiation doses were plotted.

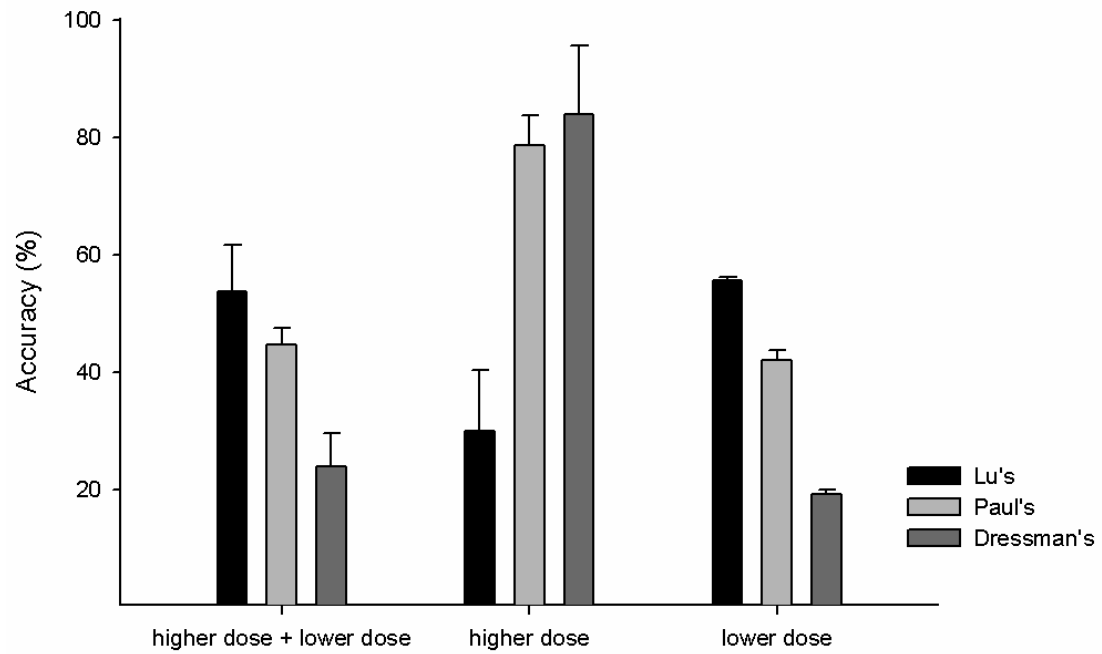

## References

1. Paul S, Amundson SA. Development of gene expression signatures for practical radiation biodosimetry. *Int J Radiat Oncol Biol Phys* 2008;71:1236-1244.
2. Dressman HK, Muramoto GG, Chao NJ, et al. Gene expression signatures that predict radiation exposure in mice and humans. *PLoS Med* 2007;4:e106.
